# Supplementary material for: Strong spin frustration and negative magnetization in LnCu3(OH)6Cl3 (Ln = Nd and Sm) with triangular lattices: the effects of lanthanides
Source: Royal Society of Chemistry journal article supplement (doi:10.1039/c7dt01798g), 2017-01-01
Supplement: c7dt01798g1.pdf [file c7dt01798g1.pdf]

## Strong spin frustration and negative magnetization in $\text{LnCu}_3(\text{OH})_6\text{Cl}_3$ (Ln = Nd and Sm) with triangular lattices: The effects of lanthanides

Wei Sun<sup>1,2</sup>, Ya-Xi Huang<sup>1</sup>, Yuanming Pan<sup>2,\*</sup> and Jin-Xiao Mi<sup>1,\*</sup>

*1: Fujian Provincial Key Laboratory of Advanced Materials, Department of Materials Science and Engineering, College of Materials, Xiamen University, Xiamen 361005, People's Republic of China:  
Email: (086) 13696905136 Fax: (086) 592-2183937 Email: jxmi@xmu.edu.cn*

*2: Department of Geological Sciences, University of Saskatchewan, Saskatoon, SK S7N 5E2, Canada:  
Tel: (306) 966-5699 Fax: (306) 966-8593 Email: yuanming.pan@usask.ca*

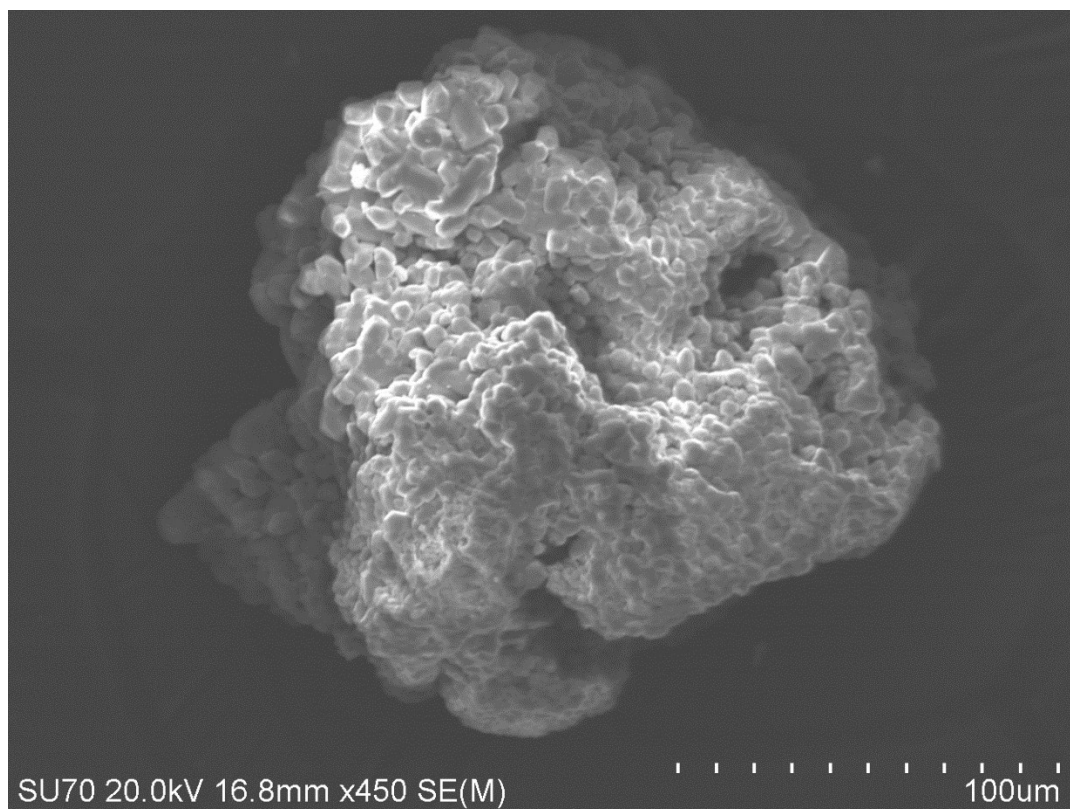

Figure S1. SEM image of  $\text{SmCu}_3(\text{OH})_6\text{Cl}_3$ .

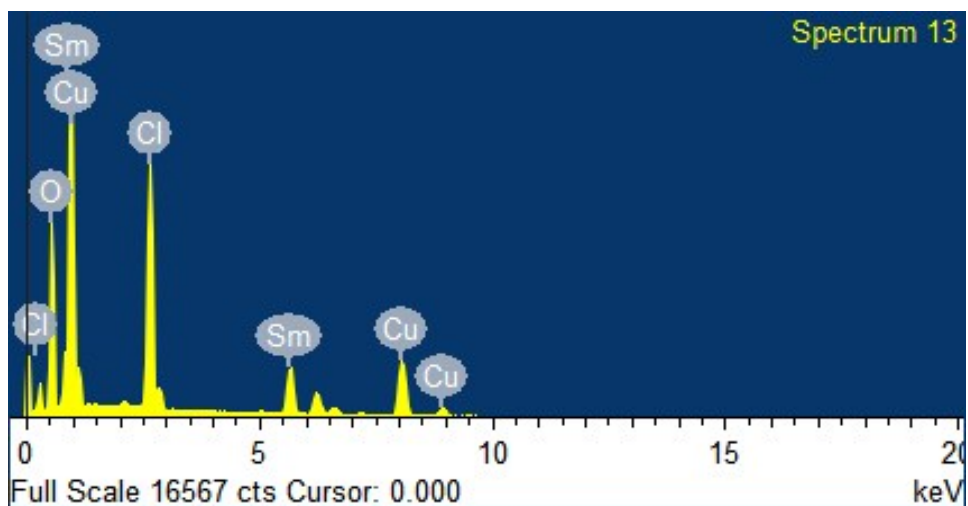

Figure S2. EDX of  $\text{SmCu}_3(\text{OH})_6\text{Cl}_3$ .

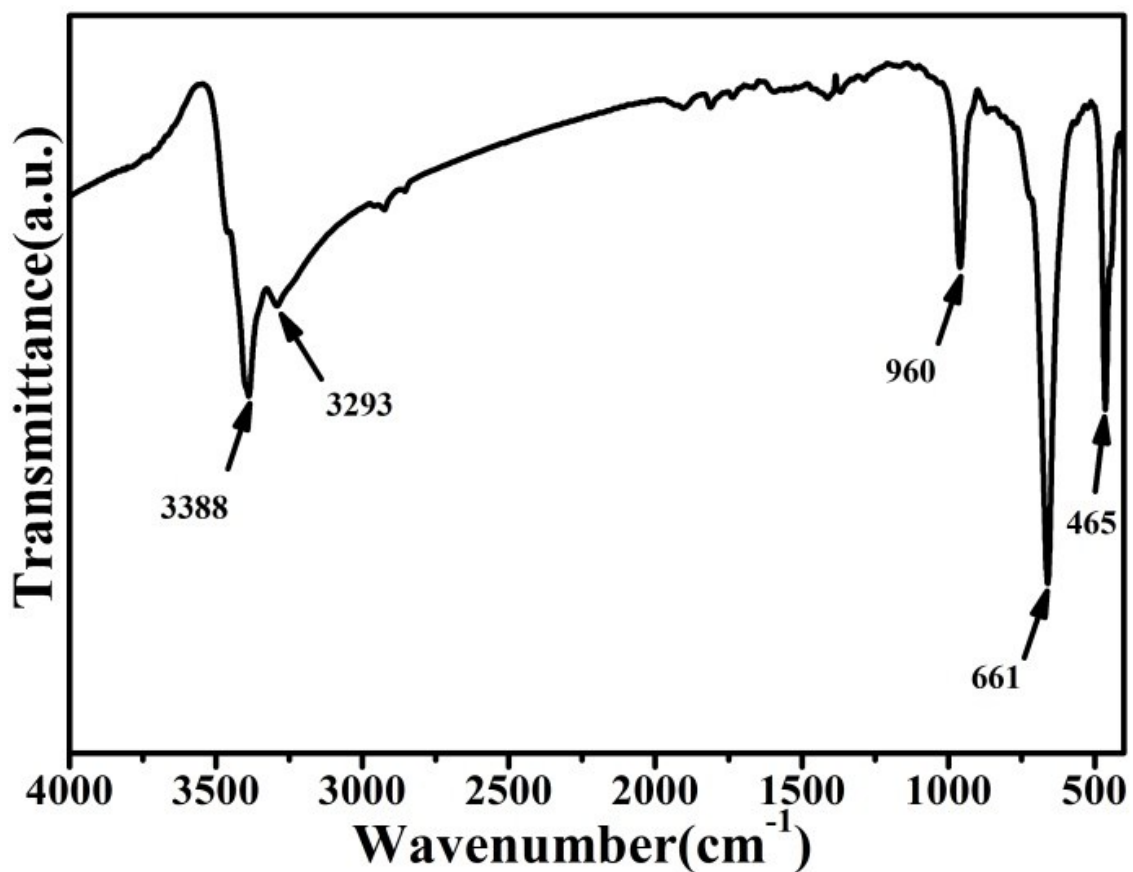

Figure S3. FTIR spectrum of  $\text{SmCu}_3(\text{OH})_6\text{Cl}_3$ .

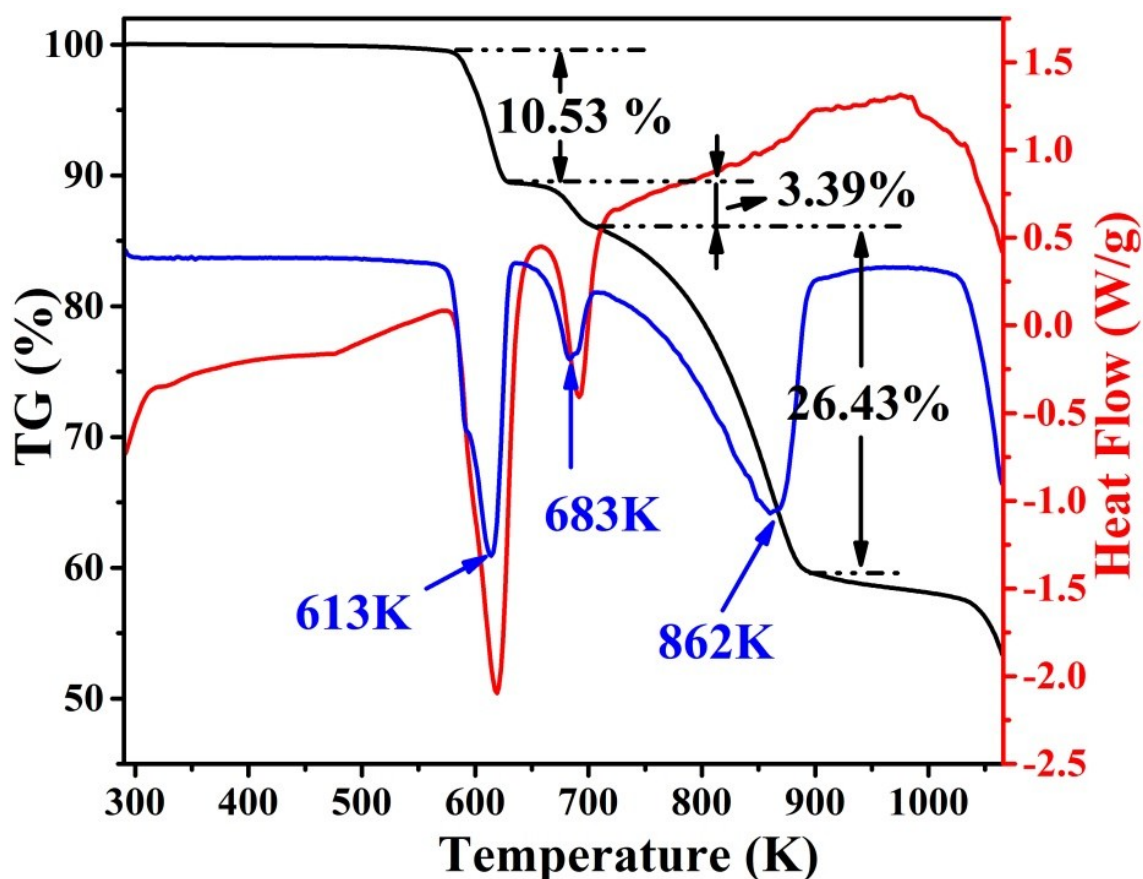

Figure S4. TG (black), DTG (blue) and DSC (red) curves of  $\text{SmCu}_3(\text{OH})_6\text{Cl}_3$ .

Table S1 Atomic displacement parameters ( $\text{\AA}^2$ ) of  $\text{LnCu}_3(\text{OH})_6\text{Cl}_3$  ( $\text{Ln} = \text{Nd}, \text{Sm}$  and  $\text{Gd}$ )

|     | $U^{11}$     | $U^{22}$     | $U^{33}$     | $U^{12}$     | $U^{13}$     | $U^{23}$    |
|-----|--------------|--------------|--------------|--------------|--------------|-------------|
| Nd1 | 0.00306 (16) | 0.00306 (16) | 0.0067 (2)   | 0.00153 (8)  | 0.000        | 0.000       |
| Cu1 | 0.0029 (2)   | 0.0029 (2)   | 0.0067 (3)   | 0.00059 (15) | -0.00100 (6) | 0.00100 (6) |
| Cl1 | 0.0161 (3)   | 0.0161 (3)   | 0.0049 (4)   | 0.00803 (17) | 0.000        | 0.000       |
| Cl2 | 0.0131 (4)   | 0.0131 (4)   | 0.0037 (5)   | 0.0065 (2)   | 0.000        | 0.000       |
| O1  | 0.0051 (6)   | 0.0046 (7)   | 0.0035 (7)   | 0.0023 (4)   | 0.0002 (3)   | 0.0004 (7)  |
| Sm1 | 0.00369 (17) | 0.00369 (17) | 0.0093 (2)   | 0.00185 (8)  | 0.000        | 0.000       |
| Cu1 | 0.0029 (2)   | 0.0029 (2)   | 0.0071 (3)   | 0.00069 (18) | -0.00101 (8) | 0.00101 (8) |
| Cl1 | 0.0151 (4)   | 0.0151 (4)   | 0.0052 (5)   | 0.0075 (2)   | 0.000        | 0.000       |
| Cl2 | 0.0123 (5)   | 0.0123 (5)   | 0.0049 (7)   | 0.0061 (3)   | 0.000        | 0.000       |
| O1  | 0.0049 (7)   | 0.0053 (9)   | 0.0042 (9)   | 0.0027 (5)   | 0.0000 (4)   | 0.0000 (8)  |
| Gd1 | 0.00290 (12) | 0.00290 (12) | 0.00982 (16) | 0.00145 (6)  | 0.000        | 0.000       |
| Cu1 | 0.00271 (15) | 0.00271 (15) | 0.0081 (2)   | 0.00043 (13) | -0.00097 (6) | 0.00097 (6) |
| Cl1 | 0.0142 (3)   | 0.0142 (3)   | 0.0064 (4)   | 0.00711 (15) | 0.000        | 0.000       |
| Cl2 | 0.0116 (4)   | 0.0116 (4)   | 0.0056 (5)   | 0.00581 (19) | 0.000        | 0.000       |
| O1  | 0.0049 (5)   | 0.0058 (7)   | 0.0049 (7)   | 0.0029 (4)   | 0.0002 (3)   | 0.0003 (6)  |

Table S2 Hydrogen-bond geometry ( $\text{\AA}$ ,  $^\circ$ ) of  $LnCu_3(OH)_6Cl_3$  ( $Ln = Nd, Sm$  and  $Gd$ )

| compounds | $D-H\cdots A$          | $D-H$    | $H\cdots A$ | $D\cdots A$ | $D-H\cdots A$ |
|-----------|------------------------|----------|-------------|-------------|---------------|
| <b>Nd</b> | $O1-H1\cdots Cl1^{xi}$ | 0.78 (2) | 2.59 (3)    | 3.2814 (19) | 148 (4)       |
|           | $O1-H1\cdots Cl2$      | 0.78 (2) | 2.73 (4)    | 3.1136 (18) | 113 (4)       |
| <b>Sm</b> | $O1-H1\cdots Cl1^{xi}$ | 0.81 (2) | 2.51 (3)    | 3.280 (2)   | 159 (6)       |
| <b>Gd</b> | $O1-H1\cdots Cl1^{xi}$ | 0.80 (2) | 2.57 (3)    | 3.2712 (18) | 147 (4)       |
|           | $O1-H1\cdots Cl2$      | 0.80 (2) | 2.66 (4)    | 3.0635 (16) | 113 (3)       |

Symmetry code: (xi)  $x, y, z-1$ .
